# Supplementary material for: A Critical Review of the First 10 Years of Candidate Gene-by-Environment Interaction Research in Psychiatry
Source: Atypon-hosted journal article supplement (doi:10.1176/appi.ajp.2011.11020191), 2011-09-03
Supplement: ajp_168_10_1041_01.pdf [file ajp_168_10_1041_01.pdf]

| <b>AUTHOR</b> | <b>Study Type</b> | <b>Sig.results</b> | <b>N</b> | <b>Reported alongside indep results?</b> |
|---------------|-------------------|--------------------|----------|------------------------------------------|
| DiLalla       | Replication       | Y                  | 62       | Y                                        |
| Foley         | Replication       | Y                  | 514      | N                                        |
| Frazzetto     | Replication       | Y                  | 82       | N                                        |
| Gibb          | Replication       | Y                  | 30       | N                                        |
| Kim           | Replication       | Y                  | 732      | Y                                        |
| Lazary        | Replication       | Y                  | 567      | N                                        |
| Madrid        | Replication       | Y                  | 304      | N                                        |
| Nilsson       | Replication       | Y                  | 81       | N                                        |
| Widom         | Replication       | Y                  | 180      | N                                        |
| Wilhelm       | Replication       | Y                  | 127      | N                                        |
| Aguilera      | Replication       | N                  | 534      | Y                                        |
| Altink        | Replication       | N                  | 946      | N                                        |
| Becker        | Replication       | N                  | 305      | Y                                        |
| Brookes       | Replication       | N                  | 1110     | N                                        |
| Brummett-S1   | Replication       | N                  | 288      | Y                                        |
| Brummett-S2   | Replication       | N                  | 142      | Y                                        |
| Chipman-S1    | Replication       | N                  | 2095     | N                                        |
| Chipman-S2    | Replication       | N                  | 584      | N                                        |
| Cicchetti     | Replication       | N                  | 339      | Y                                        |
| Eley          | Replication       | N                  | 377      | Y                                        |
| Gillespie     | Replication       | N                  | 1091     | N                                        |
| Haberstick    | Replication       | N                  | 774      | N                                        |
| Huizinga      | Replication       | N                  | 277      | N                                        |
| Kaufman-2     | Replication       | N                  | 196      | Y                                        |
| Laucht-2      | Replication       | N                  | 309      | Y                                        |
| Laucht-3      | Replication       | N                  | 309      | Y                                        |
| Neuman        | Replication       | N                  | 770      | Y                                        |
| Power         | Replication       | N                  | 1421     | N                                        |
| Propper       | Replication       | N                  | 206      | Y                                        |
| Reif          | Replication       | N                  | 184      | Y                                        |
| Sjoberg-1     | Replication       | N                  | 200      | Y                                        |
| Surtees       | Replication       | N                  | 4175     | N                                        |
| Young         | Replication       | N                  | 247      | N                                        |
| Zhang         | Replication       | N                  | 792      | Y                                        |
| Langley       | Replication       | N                  | 266      | Y                                        |
| Kim-Cohen     | Replication       | N                  | 975      | Y                                        |
| Kilpatrick    | Replication       | N                  | 589      | Y                                        |
| Chorbov       | Replication       | excluded           | NA       | NA                                       |
| Sonuga-Barke  | Replication       | excluded           | NA       | NA                                       |
| Wichers       | Replication       | excluded           | NA       | NA                                       |
| Bradley-S2    | Replication       | excluded           | NA       | NA                                       |
| Cervilla      | Replication       | excluded           | NA       | NA                                       |
| Ducci         | Replication       | excluded           | NA       | NA                                       |
| Jacobs        | Replication       | excluded           | NA       | NA                                       |
| Kaufman-1     | Replication       | excluded           | NA       | NA                                       |
| Kaufman-3     | Replication       | excluded           | NA       | NA                                       |
| Kendler       | Replication       | excluded           | NA       | NA                                       |

| <b>AUTHOR</b>        | <b>Study Type</b> | <b>Sig.results</b> | <b>N</b>     | <b>Reported alongside indep results?</b> |
|----------------------|-------------------|--------------------|--------------|------------------------------------------|
| Polanczyk-S1         | Replication       | excluded           | NA           | NA                                       |
| Polanczyk-S2         | Replication       | excluded           | NA           | NA                                       |
| Prom-Wormley         | Replication       | excluded           | NA           | NA                                       |
| Roy                  | Replication       | excluded           | NA           | NA                                       |
| Scheid               | Replication       | excluded           | NA           | NA                                       |
| Sjoberg-2            | Replication       | excluded           | NA           | NA                                       |
| Taylor               | Replication       | excluded           | NA           | NA                                       |
| Zalsman              | Replication       | excluded           | NA           | NA                                       |
| Gunthert             | Replication       | excluded           | NA           | NA                                       |
| Grabe-1              | Novel             | Y                  | not analyzed | NA                                       |
| Henquet              | Novel             | Y                  | not analyzed | NA                                       |
| Bakermans-Kranenburg | Novel             | Y                  | not analyzed | NA                                       |
| Amstadter            | Novel             | Y                  | not analyzed | NA                                       |
| Aslund               | Novel             | Y                  | not analyzed | NA                                       |
| Bau                  | Novel             | Y                  | not analyzed | NA                                       |
| Bet                  | Novel             | Y                  | not analyzed | NA                                       |
| Binder               | Novel             | Y                  | not analyzed | NA                                       |
| Blomeyer             | Novel             | Y                  | not analyzed | NA                                       |
| Bradley-S1           | Novel             | Y                  | not analyzed | NA                                       |
| Caspi-1              | Novel             | Y                  | not analyzed | NA                                       |
| Caspi-2              | Novel             | Y                  | not analyzed | NA                                       |
| Caspi-3              | Novel             | Y                  | not analyzed | NA                                       |
| Chotai               | Novel             | Y                  | not analyzed | NA                                       |
| Covault              | Novel             | Y                  | not analyzed | NA                                       |
| Dick                 | Novel             | Y                  | not analyzed | NA                                       |
| Fox                  | Novel             | Y                  | not analyzed | NA                                       |
| Gervai               | Novel             | Y                  | not analyzed | NA                                       |
| Grabe-2              | Novel             | Y                  | not analyzed | NA                                       |
| Haeffel              | Novel             | Y                  | not analyzed | NA                                       |
| Jokela-1             | Novel             | Y                  | not analyzed | NA                                       |
| Jokela-2             | Novel             | Y                  | not analyzed | NA                                       |
| Jokela-3             | Novel             | Y                  | not analyzed | NA                                       |
| Jokela-4             | Novel             | Y                  | not analyzed | NA                                       |
| Kahn                 | Novel             | Y                  | not analyzed | NA                                       |
| Keltikangas-Jarvinen | Novel             | Y                  | not analyzed | NA                                       |
| Koenen               | Novel             | Y                  | not analyzed | NA                                       |
| Lahti                | Novel             | Y                  | not analyzed | NA                                       |
| Lasky-Su             | Novel             | Y                  | not analyzed | NA                                       |
| Laucht-1             | Novel             | Y                  | not analyzed | NA                                       |
| Nobile-1             | Novel             | Y                  | not analyzed | NA                                       |
| Nobile-2             | Novel             | Y                  | not analyzed | NA                                       |
| Ozkaragoz            | Novel             | Y                  | not analyzed | NA                                       |
| Perroud              | Novel             | Y                  | not analyzed | NA                                       |
| Retz                 | Novel             | Y                  | not analyzed | NA                                       |
| Seeger               | Novel             | Y                  | not analyzed | NA                                       |
| Stein                | Novel             | Y                  | not analyzed | NA                                       |
| Stevens              | Novel             | Y                  | not analyzed | NA                                       |
| Sun                  | Novel             | Y                  | not analyzed | NA                                       |

| <b>AUTHOR</b> | <b>Study Type</b> | <b>Sig.results</b> | <b>N</b>     | <b>Reported alongside indep results?</b> |
|---------------|-------------------|--------------------|--------------|------------------------------------------|
| Todd          | Novel             | Y                  | not analyzed | NA                                       |
| van Winkel    | Novel             | Y                  | not analyzed | NA                                       |
| Vanyukov      | Novel             | Y                  | not analyzed | NA                                       |
| Waldman       | Novel             | Y                  | not analyzed | NA                                       |
| Xu            | Novel             | Y                  | not analyzed | NA                                       |
| Yen           | Novel             | Y                  | not analyzed | NA                                       |
| Gacek         | Novel             | N                  | not analyzed | NA                                       |
| Racine        | Novel             | N                  | not analyzed | NA                                       |
|               |                   |                    |              |                                          |
|               |                   |                    |              |                                          |

| <b>AUTHOR</b> | <b>Notes regarding classification - explanation given as needed</b>                                                                                                                                                                            |
|---------------|------------------------------------------------------------------------------------------------------------------------------------------------------------------------------------------------------------------------------------------------|
| DiLalla       | Replication of Bakermans-Kranenburg (2006)                                                                                                                                                                                                     |
| Foley         | Replication of Caspi (2002)                                                                                                                                                                                                                    |
| Frazzetto     | Replication of Caspi (2002)                                                                                                                                                                                                                    |
| Gibb          | Replication of Caspi (2003)                                                                                                                                                                                                                    |
| Kim           | Replication of Caspi (2003)                                                                                                                                                                                                                    |
| Lazary        | Replication of Caspi (2003)                                                                                                                                                                                                                    |
| Madrid        | Replication of Bau (2000)                                                                                                                                                                                                                      |
| Nilsson       | Replication of Caspi (2002)                                                                                                                                                                                                                    |
| Widom         | Replication of Caspi (2002) among 180 white males (subsample of full sample that most closely resembles original report)                                                                                                                       |
| Wilhelm       | Replication of Caspi (2003)                                                                                                                                                                                                                    |
| Aguilera      | Null with respect to Caspi (2003) because the interaction involving the total measure of childhood adversity was not significant. Only 1 of 4 subdimensions of childhood adversity (sexual abuse) was significant in interaction.              |
| Altink        | Null with respect to Neuman(2007)                                                                                                                                                                                                              |
| Becker        | Null with respect to Kahn (2003) because effect was only found in a subsample (males)                                                                                                                                                          |
| Brookes       | Null with respect to Seeger (2004)                                                                                                                                                                                                             |
| Brummett-S1   | Null with respect to Caspi (2003); they "found" the Caspi result for females, but the opposite result for males, and report the 3-way interaction                                                                                              |
| Brummett-S2   | Null with respect to Caspi (2003); as per above. This study could be excluded based on the environmental 'stressor' being father's education level                                                                                             |
| Chipman-S1    | Null with respect to Caspi (2003)                                                                                                                                                                                                              |
| Chipman-S2    | Null with respect to Caspi (2003)                                                                                                                                                                                                              |
| Cicchetti     | Null with respect to Caspi (2003) because significant interaction involves a different genetic model. Furthermore, the effect was only found with a subscale (sexual abuse) of the environmental variable                                      |
| Eley          | Null with respect to Caspi (2003) because effect was only found in a subsample (females)                                                                                                                                                       |
| Gillespie     | Null with respect to Caspi (2003)                                                                                                                                                                                                              |
| Haberstick    | Null with respect to Caspi (2002)                                                                                                                                                                                                              |
| Huizinga      | Null with respect to Caspi (2002)                                                                                                                                                                                                              |
| Kaufman-2     | Null with respect to Caspi (2002)                                                                                                                                                                                                              |
| Laucht-2      | Null with respect to Caspi (2003) because effect is in opposite direction                                                                                                                                                                      |
| Laucht-3      | Null with respect to Covault (2007) because effect is in opposite direction. Furthermore, the effect was only found in a subsample (males)                                                                                                     |
| Neuman        | Null with respect to Kahn (2003) because the risk allele differed. Original report of 'ADHD ~ DRD4 x Prenatal smoke exposure'*                                                                                                                 |
| Power         | Null with respect to Caspi (2003)                                                                                                                                                                                                              |
| Propper       | Null with respect to Bakermans-Kranenburg (according to authors). The parenting variable is different, but we defer to the authors' judgement. It would also be defensible to classify this study as a novel report with significant findings. |
| Reif          | Null with respect to Caspi (2002)                                                                                                                                                                                                              |
| Sjoberg-1     | Null with respect to Caspi (2003) because effect is opposite in males vs. females and is only found with certain sub-constructs of the environmental variable.                                                                                 |
| Surtees       | Null with respect to Caspi (2003)                                                                                                                                                                                                              |
| Young         | Null with respect to Caspi (2002)                                                                                                                                                                                                              |
| Zhang         | Null with respect to Caspi (2003) because effect is in opposite direction                                                                                                                                                                      |
| Langley       | Null with respect to Kahn (2003) and also null with respect to Neuman (2007)                                                                                                                                                                   |
| Kim-Cohen     | Null with respect to Caspi (2002)                                                                                                                                                                                                              |
| Kilpatrick    | Null with respect to Caspi (2003). Other significant result is a 3-way interaction                                                                                                                                                             |
| Chorbov       | Excluded because sample is females and original report (Caspi, 2003) was both                                                                                                                                                                  |
| Sonuga-Barke  | Exclude because sample is males and original report (Bakermans-Kranenburg, 2006) was mixed                                                                                                                                                     |
| Wichers       | Exclude because sample is males and original report (Caspi, 2003) was mixed                                                                                                                                                                    |
| Bradley-S2    | Exclude because this 'replication' is within the same (original) paper                                                                                                                                                                         |
| Cervilla      | Exclude because genetic model is different from Caspi (2003)                                                                                                                                                                                   |
| Ducci         | Excluded because sample is females and original report (Caspi, 2002) was in males only                                                                                                                                                         |
| Jacobs        | Excluded because sample is females and original report (Caspi 2003) was in males only. Furthermore, sample contains twins and genetic model is different.                                                                                      |
| Kaufman-1     | Exclude because genetic model is different from Covault (2007)                                                                                                                                                                                 |
| Kaufman-3     | Exclude because genetic model is different from Caspi (2003)                                                                                                                                                                                   |
| Kendler       | Exclude because genetic model is different from Caspi (2003)                                                                                                                                                                                   |

| <b>AUTHOR</b>        | <b>Notes regarding classification - explanation given as needed</b>                                                                                                                                                          |
|----------------------|------------------------------------------------------------------------------------------------------------------------------------------------------------------------------------------------------------------------------|
| Polanczyk-S1         | Exclude because insufficient information is provided to determine whether or not findings replicated ALL significant interactions from the original report (Bradley, 2008)                                                   |
| Polanczyk-S2         | Exclude because insufficient information is provided to determine whether or not findings replicated ALL significant interactions from the original report (Bradley, 2008)                                                   |
| Prom-Wormley         | Excluded because sample is females and original report (Caspi, 2002) was in males only                                                                                                                                       |
| Roy                  | Exclude because results not comparable to original report (Caspi 2003) because genetic variable in this study encompasses effects of two polymorphisms whereas the original report only examined one polymorphism (5-HTTLPR) |
| Scheid               | Excluded because sample is females and original report (Caspi, 2003) was mixed                                                                                                                                               |
| Sjoberg-2            | Excluded because sample is females and original report (Caspi, 2002) was in males only                                                                                                                                       |
| Taylor               | Exclude because genetic model is different from Caspi (2003)                                                                                                                                                                 |
| Zalsman              | Exclude because results cannot be compared to original report because genetic variable in this study encompasses effects of two polymorphisms whereas the original report only examined one polymorphism (5-HTTLPR)          |
| Gunthert             | Exclude because genotypes are coded differently from Caspi (2003)                                                                                                                                                            |
| Grabe-1              | Novel because phenotype is mental and physical distress instead of depression; therefore it is not a replication attempt of Caspi (2003)                                                                                     |
| Henquet              | Novel because the phenotype is only one symptom (among many) within psychosis; therefore it is not a replication attempt of Caspi (2005)                                                                                     |
| Bakermans-Kranenburg | Original report of 'CD/ASPD ~ DRD4 x Parenting' and original report of 'Internalizing behavior ~ DRD4 x Parenting'                                                                                                           |
| Amstadter            |                                                                                                                                                                                                                              |
| Aslund               |                                                                                                                                                                                                                              |
| Bau                  | Original report of 'Alcohol ~ DRD2 x STANLE'                                                                                                                                                                                 |
| Bet                  |                                                                                                                                                                                                                              |
| Binder               |                                                                                                                                                                                                                              |
| Blomeyer             |                                                                                                                                                                                                                              |
| Bradley-S1           | Original report of 'Depression ~ CRHR1 x STANLE'                                                                                                                                                                             |
| Caspi-1              | Original report of 'CD/ASPD ~ MAOA x STANLE'                                                                                                                                                                                 |
| Caspi-2              | Original report of 'Psychosis ~ COMT x Cannabis use'                                                                                                                                                                         |
| Caspi-3              | Original report of 'Depression ~ 5-HTTLPR x STANLE' and 'Suicide-related constructs ~ 5-HTTLPR x STANLE'                                                                                                                     |
| Chotai               | The models used in this paper do not allow for comparison with other studies - therefore we classify it as novel and do not consider it to be the first study of the 'ADHD ~ DRD4 x Season of birth' interaction             |
| Covault              | Original report of 'Alcohol ~ 5-HTTLPR x STANLE'                                                                                                                                                                             |
| Dick                 |                                                                                                                                                                                                                              |
| Fox                  |                                                                                                                                                                                                                              |
| Gervai               |                                                                                                                                                                                                                              |
| Grabe-2              |                                                                                                                                                                                                                              |
| Haefel               |                                                                                                                                                                                                                              |
| Jokela-1             |                                                                                                                                                                                                                              |
| Jokela-2             |                                                                                                                                                                                                                              |
| Jokela-3             |                                                                                                                                                                                                                              |
| Jokela-4             |                                                                                                                                                                                                                              |
| Kahn                 | Original report of 'ADHD ~ DAT1 x Prenatal smoke exposure'                                                                                                                                                                   |
| Keltikangas-Jarvinen |                                                                                                                                                                                                                              |
| Koenen               |                                                                                                                                                                                                                              |
| Lahti                |                                                                                                                                                                                                                              |
| Lasky-Su             |                                                                                                                                                                                                                              |
| Laucht-1             |                                                                                                                                                                                                                              |
| Nobile-1             |                                                                                                                                                                                                                              |
| Nobile-2             |                                                                                                                                                                                                                              |
| Ozkaragoz            |                                                                                                                                                                                                                              |
| Perroud              |                                                                                                                                                                                                                              |
| Retz                 |                                                                                                                                                                                                                              |
| Seeger               | Original report of 'ADHD ~ DRD4 x Season of birth'                                                                                                                                                                           |
| Stein                |                                                                                                                                                                                                                              |
| Stevens              |                                                                                                                                                                                                                              |
| Sun                  |                                                                                                                                                                                                                              |

| AUTHOR     | Notes regarding classification - explanation given as needed                                                                                                      |
|------------|-------------------------------------------------------------------------------------------------------------------------------------------------------------------|
| Todd       |                                                                                                                                                                   |
| van Winkel |                                                                                                                                                                   |
| Vanyukov   |                                                                                                                                                                   |
| Waldman    |                                                                                                                                                                   |
| Xu         |                                                                                                                                                                   |
| Yen        |                                                                                                                                                                   |
| Gacek      |                                                                                                                                                                   |
| Racine     |                                                                                                                                                                   |
|            |                                                                                                                                                                   |
|            | <p>* Neuman is notable because it provides a replication attempt of Kahn (2003) AND it introduces a novel interaction: 'ADHD ~ DRD4 x Prenatal smoke exposure</p> |
|            | <p>STANLE = Stressful, traumatic, adverse, and/or negative life events</p>                                                                                        |
|            | <p>CD/ASPD = conduct disorder/antisocial personality disorder related constructs including violence</p>                                                           |

| AUTHOR       | Defensible alternative codings                                                                                                                                                                  |
|--------------|-------------------------------------------------------------------------------------------------------------------------------------------------------------------------------------------------|
| DiLalla      |                                                                                                                                                                                                 |
| Foley        |                                                                                                                                                                                                 |
| Frazzetto    |                                                                                                                                                                                                 |
| Gibb         |                                                                                                                                                                                                 |
| Kim          |                                                                                                                                                                                                 |
| Lazary       |                                                                                                                                                                                                 |
| Madrid       |                                                                                                                                                                                                 |
| Nilsson      |                                                                                                                                                                                                 |
| Widom        | Alternative coding is a non-replication with a sample of 278                                                                                                                                    |
| Wilhelm      |                                                                                                                                                                                                 |
| Aguilera     | Could say it is positive                                                                                                                                                                        |
| Altink       |                                                                                                                                                                                                 |
| Becker       |                                                                                                                                                                                                 |
| Brookes      |                                                                                                                                                                                                 |
| Brummett-S1  |                                                                                                                                                                                                 |
| Brummett-S2  |                                                                                                                                                                                                 |
| Chipman-S1   |                                                                                                                                                                                                 |
| Chipman-S2   |                                                                                                                                                                                                 |
| Cicchetti    |                                                                                                                                                                                                 |
| Eley         |                                                                                                                                                                                                 |
| Gillespie    |                                                                                                                                                                                                 |
| Haberstick   |                                                                                                                                                                                                 |
| Huizinga     |                                                                                                                                                                                                 |
| Kaufman-2    |                                                                                                                                                                                                 |
| Laucht-2     |                                                                                                                                                                                                 |
| Laucht-3     |                                                                                                                                                                                                 |
| Neuman       |                                                                                                                                                                                                 |
| Power        |                                                                                                                                                                                                 |
| Propper      | This could be classified as a novel study with significant effect.                                                                                                                              |
| Reif         | Note, this is a replication attempt with violence as the phenotype (one of Caspi's original outcome measures, in addition to CD and ASPD symptoms). Could say this is not a replication attempt |
| Sjoberg-1    | Consider excluding because results for males and females combined are unclear                                                                                                                   |
| Surtees      |                                                                                                                                                                                                 |
| Young        |                                                                                                                                                                                                 |
| Zhang        |                                                                                                                                                                                                 |
| Langley      |                                                                                                                                                                                                 |
| Kim-Cohen    | Alternative coding is to exclude this study                                                                                                                                                     |
| Kilpatrick   |                                                                                                                                                                                                 |
| Chorbov      |                                                                                                                                                                                                 |
| Sonuga-Barke | If we were to include it, null with respect to Bakermans-Kranenburg (according to authors?)                                                                                                     |
| Wichers      |                                                                                                                                                                                                 |
| Bradley-S2   | ALTERNATIVE CODING is to include this as a positive replication                                                                                                                                 |
| Cervilla     |                                                                                                                                                                                                 |
| Ducci        |                                                                                                                                                                                                 |
| Jacobs       |                                                                                                                                                                                                 |
| Kaufman-1    |                                                                                                                                                                                                 |
| Kaufman-3    |                                                                                                                                                                                                 |
| Kendler      |                                                                                                                                                                                                 |

| AUTHOR               | Defensible alternative codings |
|----------------------|--------------------------------|
| Polanczyk-S1         |                                |
| Polanczyk-S2         |                                |
| Prom-Wormley         |                                |
| Roy                  |                                |
| Scheid               |                                |
| Sjoberg-2            |                                |
| Taylor               |                                |
| Zalsman              |                                |
| Gunthert             |                                |
| Grabe-1              |                                |
| Henquet              |                                |
| Bakermans-Kranenburg |                                |
| Amstadter            |                                |
| Aslund               |                                |
| Bau                  |                                |
| Bet                  |                                |
| Binder               |                                |
| Blomeyer             |                                |
| Bradley-S1           |                                |
| Caspi-1              |                                |
| Caspi-2              |                                |
| Caspi-3              |                                |
| Chotai               |                                |
| Covault              |                                |
| Dick                 |                                |
| Fox                  |                                |
| Gervai               |                                |
| Grabe-2              |                                |
| Haeffel              |                                |
| Jokela-1             |                                |
| Jokela-2             |                                |
| Jokela-3             |                                |
| Jokela-4             |                                |
| Kahn                 |                                |
| Keltikangas-Jarvinen |                                |
| Koenen               |                                |
| Lahti                |                                |
| Lasky-Su             |                                |
| Laucht-1             |                                |
| Nobile-1             |                                |
| Nobile-2             |                                |
| Ozkaragoz            |                                |
| Perroud              |                                |
| Retz                 |                                |
| Seeger               |                                |
| Stein                |                                |
| Stevens              |                                |
| Sun                  |                                |



| AUTHOR     | Defensible alternative codings |
|------------|--------------------------------|
| Todd       |                                |
| van Winkel |                                |
| Vanyukov   |                                |
| Waldman    |                                |
| Xu         |                                |
| Yen        |                                |
| Gacek      |                                |
| Racine     |                                |
|            |                                |
|            |                                |
